# Supplementary material
Source: PubMed Central journal article supplement (PMC6380932)
Supplement: NIHMS979588-supplement-1.pdf [file NIHMS979588-supplement-1.pdf]

## Supplementary Material

Table S1. List of AQS monitors included for nearest monitor selection. Monitors were required to have collected data during the entire study period.

| <b>Monitor ID</b> |
|-------------------|
| 060370002         |
| 060371103         |
| 060372005         |
| 060658001         |
| 170310022         |
| 170310052         |
| 170312001         |
| 170313301         |
| 170314201         |
| 245100007         |
| 271230868         |
| 340030003         |
| 340310005         |
| 360050080         |
| 360050110         |
| 370670022         |

Table S2. Number of participants monitored and number with nonmissing and valid components for one or more 2-week rounds of air monitoring.

|                                      | <b>W-S</b> | <b>NY</b> | <b>Baltimore</b> | <b>St. Paul</b> | <b>Chicago</b> | <b>LA</b> | <b>Total</b> |
|--------------------------------------|------------|-----------|------------------|-----------------|----------------|-----------|--------------|
| Monitored Once                       | 1          | 1         | 2                | 0               | 0              | 0         | <b>4</b>     |
| Monitored Twice                      | 12         | 20        | 12               | 13              | 13             | 16        | <b>86</b>    |
| All components valid for one round   | 5          | 5         | 3                | 5               | 3              | 8         | <b>29</b>    |
| All components valid for two rounds  | 5          | 3         | 10               | 7               | 4              | 2         | <b>31</b>    |
| N, All components at least one round | 10         | 8         | 13               | 12              | 7              | 10        | <b>60</b>    |

Table S3. Summary statistics of total PM<sub>2.5</sub> and sulfur measurements (n=91 total 2-week rounds, including 31 participants with 2 rounds (62 rounds) and 29 participants with 1 round of sampling). All values are in µg/m<sup>3</sup>.

|                                  | Mean | SD  | Min | 25 <sup>th</sup> | Median | 75 <sup>th</sup> | Max  |
|----------------------------------|------|-----|-----|------------------|--------|------------------|------|
| <b>Outdoor PM<sub>2.5</sub></b>  | 13.8 | 5.6 | 5.8 | 10.1             | 12.9   | 16.9             | 43.9 |
| <b>Indoor PM<sub>2.5</sub></b>   | 9.8  | 5.0 | 0.9 | 5.8              | 8.6    | 12.8             | 27.6 |
| <b>Personal PM<sub>2.5</sub></b> | 11.8 | 6.1 | 0.1 | 7.8              | 10.9   | 14.1             | 34.0 |
| <b>Outdoor Sulfur</b>            | 1.3  | 0.7 | 0.2 | 0.8              | 1.1    | 1.7              | 3.5  |
| <b>Indoor Sulfur</b>             | 0.7  | 0.5 | 0.0 | 0.4              | 0.6    | 0.9              | 2.0  |
| <b>Personal Sulfur</b>           | 0.7  | 0.4 | 0.1 | 0.4              | 0.6    | 0.9              | 2.0  |

Table S4. Summary statistics of metrics for exposure to ambient-origin PM<sub>2.5</sub> (n=91 total 2-week rounds, including 31 participants with 2 rounds (62 rounds) and 29 participants with 1 round of sampling). All values are in µg/m<sup>3</sup>.

|                                        | Mean | SD  | Min | 25 <sup>th</sup> | Median | 75 <sup>th</sup> | Max  |
|----------------------------------------|------|-----|-----|------------------|--------|------------------|------|
| <b>1. PM<sub>2.5</sub>-pers(m)</b>     | 7.6  | 3.7 | 2.1 | 4.8              | 6.7    | 9.1              | 21.6 |
| <b>2. PM<sub>2.5</sub>-out(m)</b>      | 13.8 | 5.6 | 5.8 | 10.1             | 12.9   | 16.9             | 43.9 |
| <b>3. PM<sub>2.5</sub>-out(p)</b>      | 13.0 | 4.6 | 5.9 | 9.3              | 12.3   | 15.8             | 33.9 |
| <b>4. PM<sub>2.5</sub>-out(nm)</b>     | 13.4 | 5.1 | 4.9 | 10.1             | 12.8   | 15.9             | 37.2 |
| <b>5. PM<sub>2.5</sub>-in(m)</b>       | 7.9  | 5.5 | 0.0 | 4.8              | 6.6    | 9.0              | 42.2 |
| <b>6. PM<sub>2.5</sub>-in(p)</b>       | 7.6  | 4.0 | 3.1 | 5.1              | 6.3    | 8.1              | 26.8 |
| <b>7. PM<sub>2.5</sub>-pers(m-alt)</b> | 8.5  | 5.4 | 1.2 | 5.2              | 7.4    | 9.5              | 42.3 |
| <b>8. PM<sub>2.5</sub>-pers(p)</b>     | 8.0  | 4.0 | 3.7 | 5.5              | 6.9    | 8.8              | 27.7 |

Table S5. Summary statistics of metrics for exposure to ambient-origin PM<sub>2.5</sub> for 31 participants with 2 2-week rounds of sampling. The value among averaged repeat measurements is shown in parentheses. All values are in µg/m<sup>3</sup>.

|                                        | Mean           | SD           | Min          | 25 <sup>th</sup> | Median         | 75 <sup>th</sup> | Max            |
|----------------------------------------|----------------|--------------|--------------|------------------|----------------|------------------|----------------|
| <b>1. PM<sub>2.5</sub>-pers(m)</b>     | 7.2<br>(7.2)   | 3.1<br>(2.7) | 2.6<br>(3.4) | 4.7<br>(5.5)     | 6.8<br>(6.5)   | 8.9<br>(8.1)     | 17.7<br>(14.0) |
| <b>2. PM<sub>2.5</sub>-out(m)</b>      | 13.4<br>(13.4) | 4.4<br>(3.0) | 7.5<br>(8.5) | 10.2<br>(11.1)   | 12.6<br>(13.8) | 15.1<br>(15.2)   | 29.2<br>(21.5) |
| <b>3. PM<sub>2.5</sub>-out(p)</b>      | 13.5<br>(13.5) | 5.0<br>(3.8) | 6.8<br>(7.9) | 10.4<br>(11.4)   | 13.0<br>(13.2) | 15.9<br>(14.7)   | 37.2<br>(26.0) |
| <b>4. PM<sub>2.5</sub>-out(nm)</b>     | 12.9<br>(12.9) | 4.4<br>(3.3) | 7.5<br>(8.3) | 9.8<br>(10.9)    | 12.5<br>(13.0) | 14.8<br>(14.3)   | 33.9<br>(24.6) |
| <b>5. PM<sub>2.5</sub>-in(m)</b>       | 7.4<br>(7.4)   | 4.0<br>(3.3) | 0.9<br>(3.3) | 4.6<br>(4.8)     | 6.8<br>(6.7)   | 8.9<br>(8.6)     | 24.4<br>(18.2) |
| <b>6. PM<sub>2.5</sub>-in(p)</b>       | 7.4<br>(7.4)   | 4.0<br>(3.4) | 3.1<br>(3.5) | 5.1<br>(5.7)     | 6.3<br>(6.4)   | 7.9<br>(7.7)     | 26.8<br>(20.1) |
| <b>7. PM<sub>2.5</sub>-pers(m-alt)</b> | 8.0<br>(8.0)   | 3.9<br>(3.2) | 2.9<br>(3.7) | 5.2<br>(5.7)     | 7.3<br>(7.3)   | 9.4<br>(8.7)     | 25.3<br>(18.8) |
| <b>8. PM<sub>2.5</sub>-pers(p)</b>     | 7.8<br>(7.8)   | 4.0<br>(3.4) | 3.7<br>(3.9) | 5.6<br>(6.2)     | 6.6<br>(6.7)   | 8.2<br>(8.2)     | 27.7<br>(20.6) |

Table S6. Root Mean Squared Error between metrics for exposure to ambient-origin PM<sub>2.5</sub> among all measurements (n=91 total 2-week rounds, including 31 participants with 2 rounds (62 rounds) and 29 participants with 1 round of sampling). Primary comparisons are shaded. All values are in  $\mu\text{g}/\text{m}^3$ .

|                                   | 1. PM <sub>2.5</sub> -pers(m) | 2. PM <sub>2.5</sub> -out(m) | 3. PM <sub>2.5</sub> -out(p) | 4. PM <sub>2.5</sub> -out(nm) | 5. PM <sub>2.5</sub> -in(m) | 6. PM <sub>2.5</sub> -in(p) | 7. PM <sub>2.5</sub> -pers(m-alt) | 8. PM <sub>2.5</sub> -pers(p) |
|-----------------------------------|-------------------------------|------------------------------|------------------------------|-------------------------------|-----------------------------|-----------------------------|-----------------------------------|-------------------------------|
|                                   | pers(m)                       | out(m)                       | out(p)                       | out(nm)                       | in(m)                       | in(p)                       | pers(m-alt)                       | pers(p)                       |
| 1. PM <sub>2.5</sub> -pers(m)     | 0.00                          | 2.68                         | 2.88                         | 3.35                          | 1.77                        | 2.19                        | 1.78                              | 2.23                          |
| 2. PM <sub>2.5</sub> -out(m)      | 4.02                          | 0.00                         | 3.35                         | 3.98                          | 3.60                        | 4.36                        | 3.39                              | 4.27                          |
| 3. PM <sub>2.5</sub> -out(p)      | 3.53                          | 2.75                         | 0.00                         | 2.27                          | 3.80                        | 2.90                        | 3.70                              | 2.79                          |
| 4. PM <sub>2.5</sub> -out(nm)     | 4.60                          | 3.64                         | 2.54                         | 0.00                          | 4.61                        | 3.96                        | 4.53                              | 3.86                          |
| 5. PM <sub>2.5</sub> -in(m)       | 2.59                          | 3.52                         | 4.54                         | 4.92                          | 0.00                        | 3.53                        | 0.55                              | 3.53                          |
| 6. PM <sub>2.5</sub> -in(p)       | 2.37                          | 3.15                         | 2.56                         | 3.13                          | 2.61                        | 0.00                        | 2.58                              | 0.38                          |
| 7. PM <sub>2.5</sub> -pers(m-alt) | 2.58                          | 3.27                         | 4.36                         | 4.77                          | 0.54                        | 3.44                        | 0.00                              | 3.42                          |
| 8. PM <sub>2.5</sub> -pers(p)     | 2.42                          | 3.09                         | 2.47                         | 3.05                          | 2.61                        | 0.38                        | 2.57                              | 0.00                          |

Table S7. Pearson correlations between metrics for exposure to ambient-origin PM<sub>2.5</sub>. Correlations are those among 31 participants with 2 2-week rounds of sampling. The value among averaged repeat measurements is shown in parentheses. Primary comparisons are shaded.

|                                   | 1. PM <sub>2.5</sub> -pers(m) | 2. PM <sub>2.5</sub> -out(m) | 3. PM <sub>2.5</sub> -out(p) | 4. PM <sub>2.5</sub> -out(nm) | 5. PM <sub>2.5</sub> -in(m) | 6. PM <sub>2.5</sub> -in(p) | 7. PM <sub>2.5</sub> -pers(m-alt) |
|-----------------------------------|-------------------------------|------------------------------|------------------------------|-------------------------------|-----------------------------|-----------------------------|-----------------------------------|
| 2. PM <sub>2.5</sub> -out(m)      | 0.56<br>(0.51)                |                              |                              |                               |                             |                             |                                   |
| 3. PM <sub>2.5</sub> -out(p)      | 0.67<br>(0.66)                | 0.86<br>(0.91)               |                              |                               |                             |                             |                                   |
| 4. PM <sub>2.5</sub> -out(nm)     | 0.48<br>(0.40)                | 0.77<br>(0.85)               | 0.85<br>(0.83)               |                               |                             |                             |                                   |
| 5. PM <sub>2.5</sub> -in(m)       | 0.90<br>(0.92)                | 0.61<br>(0.57)               | 0.70<br>(0.70)               | 0.56<br>(0.52)                |                             |                             |                                   |
| 6. PM <sub>2.5</sub> -in(p)       | 0.79<br>(0.81)                | 0.56<br>(0.59)               | 0.77<br>(0.78)               | 0.65<br>(0.59)                | 0.87<br>(0.89)              |                             |                                   |
| 7. PM <sub>2.5</sub> -pers(m-alt) | 0.89<br>(0.92)                | 0.65<br>(0.59)               | 0.72<br>(0.72)               | 0.58<br>(0.55)                | 0.99<br>(0.99)              | 0.87<br>(0.89)              |                                   |
| 8. PM <sub>2.5</sub> -pers(p)     | 0.78<br>(0.80)                | 0.57<br>(0.59)               | 0.78<br>(0.78)               | 0.66<br>(0.60)                | 0.87<br>(0.88)              | 1.00<br>(1.00)              | 0.87<br>(0.89)                    |

Table S8. Relative percent difference ( $|X-Y|/\text{mean}(X,Y)$ ) between metrics for exposure to ambient-origin  $\text{PM}_{2.5}$ . Values given are those among 31 participants with 2 2-week rounds of sampling, with the averaged repeat measurements in parentheses. Primary comparisons are shaded.

|                                   | 1. $\text{PM}_{2.5}$ -<br>pers(m) | 2. $\text{PM}_{2.5}$ -<br>out(m) | 3. $\text{PM}_{2.5}$ -<br>out(p) | 4. $\text{PM}_{2.5}$ -<br>out(nm) | 5. $\text{PM}_{2.5}$ -<br>in(m) | 6. $\text{PM}_{2.5}$ -<br>in(p) | 7. $\text{PM}_{2.5}$ -<br>pers(m-alt) |
|-----------------------------------|-----------------------------------|----------------------------------|----------------------------------|-----------------------------------|---------------------------------|---------------------------------|---------------------------------------|
| 2. $\text{PM}_{2.5}$ -out(m)      | 62%<br>(62%)                      |                                  |                                  |                                   |                                 |                                 |                                       |
| 3. $\text{PM}_{2.5}$ -out(p)      | 59%<br>(59%)                      | 12%<br>(8%)                      |                                  |                                   |                                 |                                 |                                       |
| 4. $\text{PM}_{2.5}$ -out(nm)     | 63%<br>(63%)                      | 16%<br>(12%)                     | 14%<br>(11%)                     |                                   |                                 |                                 |                                       |
| 5. $\text{PM}_{2.5}$ -in(m)       | 15%<br>(11%)                      | 62%<br>(61%)                     | 58%<br>(57%)                     | 62%<br>(61%)                      |                                 |                                 |                                       |
| 6. $\text{PM}_{2.5}$ -in(p)       | 23%<br>(19%)                      | 62%<br>(62%)                     | 58%<br>(58%)                     | 63%<br>(63%)                      | 24%<br>(18%)                    |                                 |                                       |
| 7. $\text{PM}_{2.5}$ -pers(m-alt) | 14%<br>(13%)                      | 54%<br>(53%)                     | 50%<br>(49%)                     | 54%<br>(54%)                      | 10%<br>(9%)                     | 23%<br>(19%)                    |                                       |
| 8. $\text{PM}_{2.5}$ -pers(p)     | 23%<br>(19%)                      | 57%<br>(57%)                     | 53%<br>(52%)                     | 58%<br>(58%)                      | 24%<br>(19%)                    | 6%<br>(6%)                      | 21%<br>(17%)                          |

Table S9. RMSE between metrics for exposure to ambient-origin  $\text{PM}_{2.5}$ . The main values given are those among 31 participants with 2 2-week rounds of sampling. The value among averaged repeat measurements is shown in parentheses. All units are  $\mu\text{g}/\text{m}^3$ . Primary comparisons are shaded.

|                                   | 1. $\text{PM}_{2.5}$ -<br>pers(m) | 2. $\text{PM}_{2.5}$ -<br>out(m) | 3. $\text{PM}_{2.5}$ -<br>out(p) | 4. $\text{PM}_{2.5}$ -<br>out(nm) | 5. $\text{PM}_{2.5}$ -<br>in(m) | 6. $\text{PM}_{2.5}$ -<br>in(p) | 7. $\text{PM}_{2.5}$ -<br>pers(m-alt) | 8. $\text{PM}_{2.5}$ -<br>pers(p) |
|-----------------------------------|-----------------------------------|----------------------------------|----------------------------------|-----------------------------------|---------------------------------|---------------------------------|---------------------------------------|-----------------------------------|
| 1. $\text{PM}_{2.5}$ -pers(m)     | 0.00<br>(0.00)                    | 2.56<br>(2.30)                   | 2.29<br>(2.01)                   | 2.72<br>(2.46)                    | 1.33<br>(1.02)                  | 1.90<br>(1.57)                  | 1.39<br>(1.07)                        | 1.93<br>(1.60)                    |
| 2. $\text{PM}_{2.5}$ -out(m)      | 3.62<br>(2.57)                    | 0.00<br>(0.00)                   | 2.22<br>(1.27)                   | 2.82<br>(1.59)                    | 3.46<br>(2.47)                  | 3.62<br>(2.43)                  | 3.33<br>(2.43)                        | 3.59<br>(2.43)                    |
| 3. $\text{PM}_{2.5}$ -out(p)      | 3.24<br>(2.43)                    | 2.21<br>(1.38)                   | 0.00<br>(0.00)                   | 2.27<br>(1.83)                    | 3.14<br>(2.30)                  | 2.78<br>(2.04)                  | 3.04<br>(2.26)                        | 2.72<br>(2.02)                    |
| 4. $\text{PM}_{2.5}$ -out(nm)     | 4.40<br>(3.42)                    | 3.22<br>(1.98)                   | 2.60<br>(2.11)                   | 0.00<br>(0.00)                    | 4.16<br>(3.19)                  | 3.81<br>(3.01)                  | 4.07<br>(3.11)                        | 3.75<br>(2.98)                    |
| 5. $\text{PM}_{2.5}$ -in(m)       | 1.69<br>(1.25)                    | 3.10<br>(2.68)                   | 2.83<br>(2.31)                   | 3.27<br>(2.78)                    | 0.00<br>(0.00)                  | 1.91<br>(1.47)                  | 0.48<br>(0.35)                        | 1.95<br>(1.52)                    |
| 6. $\text{PM}_{2.5}$ -in(p)       | 2.43<br>(1.97)                    | 3.26<br>(2.72)                   | 2.52<br>(2.11)                   | 3.01<br>(2.71)                    | 1.92<br>(1.52)                  | 0.00<br>(0.00)                  | 1.93<br>(1.52)                        | 0.31<br>(0.27)                    |
| 7. $\text{PM}_{2.5}$ -pers(m-alt) | 1.75<br>(1.27)                    | 2.95<br>(2.57)                   | 2.70<br>(2.20)                   | 3.16<br>(2.64)                    | 0.48<br>(0.34)                  | 1.89<br>(1.43)                  | 0.00<br>(0.00)                        | 1.90<br>(1.46)                    |
| 8. $\text{PM}_{2.5}$ -pers(p)     | 2.48<br>(1.99)                    | 3.26<br>(2.71)                   | 2.47<br>(2.08)                   | 2.98<br>(2.67)                    | 1.97<br>(1.56)                  | 0.31<br>(0.27)                  | 1.95<br>(1.54)                        | 0.00<br>(0.00)                    |

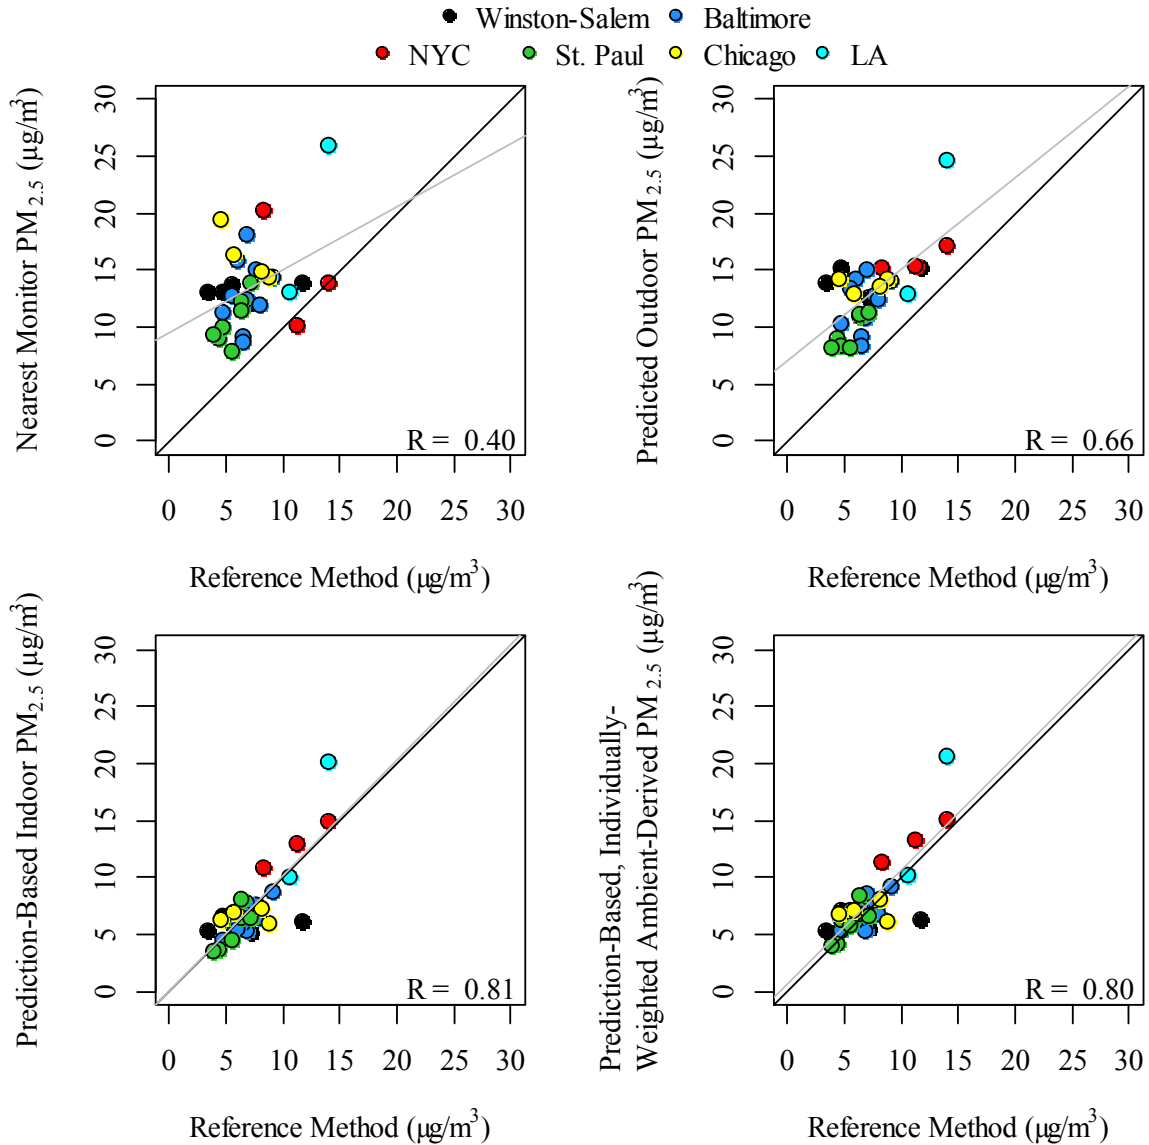

Figure S1. Comparison between reference method ( $(\text{Sulfur}_{2.5\text{-pers}} / \text{Sulfur}_{2.5\text{-out}}) * \text{PM}_{2.5\text{-out(m)}}$ ) and four metrics for exposure to ambient-origin PM<sub>2.5</sub>: 1) Average concentration at nearest regulatory monitor, 2) outdoor ( $\text{PM}_{2.5\text{-out(p)}}$ ), 3) indoor ( $\text{PM}_{2.5\text{-in(p)}}$ ), and 4) individually-weighted, ambient derived ( $\text{PM}_{2.5\text{-out(p)}} * t_{\text{out-MAQ}} + F_{\text{inf(p)}} * \text{PM}_{2.5\text{-out(p)}} * (1 - t_{\text{out-MAQ}})$ ) for 31 individuals averaged over 2 2-week rounds of sampling. All metrics are ambient origin PM<sub>2.5</sub>, not total PM<sub>2.5</sub>. Predicted outdoor PM<sub>2.5</sub> is expected to be higher than personal exposure due to the attenuation by infiltration and time spent indoors. The 1-1 line (black) and best fit line (gray) are shown for reference.

Table S10. Pearson correlation between reference exposure metric and other metrics for exposure to ambient-origin PM<sub>2.5</sub> using all valid 2-week observations.

|                                   | <b>N</b> | <b>R</b> |
|-----------------------------------|----------|----------|
| 1. PM <sub>2.5</sub> -pers(m)     | --       | 1.00     |
| 2. PM <sub>2.5</sub> -out(m)      | 105      | 0.68     |
| 3. PM <sub>2.5</sub> -out(p)      | 105      | 0.60     |
| 4. PM <sub>2.5</sub> -out(nm)     | 105      | 0.42     |
| 5. PM <sub>2.5</sub> -in(m)       | 94       | 0.87     |
| 6. PM <sub>2.5</sub> -in(p)       | 105      | 0.79     |
| 7. PM <sub>2.5</sub> -pers(m-alt) | 91       | 0.88     |
| 8. PM <sub>2.5</sub> -pers(p)     | 105      | 0.78     |

Table S11. Summary statistics for all metrics for exposure to ambient-origin PM<sub>2.5</sub>, among all valid 2-week samples. All values are in µg/m<sup>3</sup>.

|                                   | <b>N</b> | <b>Mean</b> | <b>SD</b> | <b>Min</b> | <b>25<sup>th</sup></b> | <b>Median</b> | <b>75<sup>th</sup></b> | <b>Max</b> |
|-----------------------------------|----------|-------------|-----------|------------|------------------------|---------------|------------------------|------------|
| 1. PM <sub>2.5</sub> -pers(m)     | 105      | 7.6         | 3.9       | 1.4        | 4.8                    | 6.7           | 9.0                    | 23.1       |
| 2. PM <sub>2.5</sub> -out(m)      | 142      | 14.0        | 5.9       | 0.6        | 10.3                   | 13.0          | 17.0                   | 43.9       |
| 3. PM <sub>2.5</sub> -out(p)      | 162      | 13.5        | 4.9       | 4.9        | 10.2                   | 13.0          | 16.1                   | 37.2       |
| 4. PM <sub>2.5</sub> -out(nm)     | 160      | 13.6        | 4.8       | 5.3        | 10.3                   | 12.9          | 16.3                   | 34.0       |
| 5. PM <sub>2.5</sub> -in(m)       | 142      | 8.5         | 5.8       | 0.0        | 4.9                    | 7.0           | 10.7                   | 42.2       |
| 6. PM <sub>2.5</sub> -in(p)       | 160      | 8.6         | 4.4       | 1.7        | 5.8                    | 7.5           | 10.1                   | 28.9       |
| 7. PM <sub>2.5</sub> -pers(m-alt) | 114      | 9.2         | 5.7       | 1.2        | 5.8                    | 7.8           | 10.9                   | 42.3       |
| 8. PM <sub>2.5</sub> -pers(p)     | 160      | 8.2         | 4.4       | 1.7        | 5.3                    | 7.2           | 9.8                    | 28.7       |

Table S12. Comparison between infiltration model developed using full data and estimation of the same model excluding the personal monitoring homes.

| <b>Cold Season Model</b>                 |                  |                                           |                   |
|------------------------------------------|------------------|-------------------------------------------|-------------------|
| <b>Variable</b>                          | <b>Full Data</b> | <b>Excludes Personal Monitoring Homes</b> | <b>Difference</b> |
| Intercept                                | 0.52254          | 0.52020                                   | < 1%              |
| Temperature                              | 0.01124          | 0.01081                                   | 4%                |
| Forced Air Heat                          | -0.11699         | -0.10679                                  | 9%                |
| July Window > Half of Days               | 0.08385          | 0.09455                                   | 12%               |
| Double Pane Windows                      | -0.05155         | -0.06382                                  | 21%               |
| January Window > Half of Days            | 0.05255          | 0.05926                                   | 12%               |
| <b>Warm Season Model (&gt; 18 deg C)</b> |                  |                                           |                   |
| Intercept                                | 0.72427          | 0.71831                                   | < 1%              |
| Very Warm (> 25 deg C)                   | 0.00851          | 0.01091                                   | 25%               |
| Central Air July > Half                  | -0.21515         | -0.21949                                  | 2%                |
| Central Air July * Very Warm             | -0.16320         | -0.16204                                  | < 1%              |
| July Window > Half of Days               | 0.14807          | 0.15962                                   | 8%                |
| Central July Few                         | -0.09653         | -0.11896                                  | 21%               |

Figure S2. Comparison between  $F_{\text{inf}}$  calculated by each method for personal monitoring homes.  $R^2 = 0.997$ . Maximum difference is 0.026.

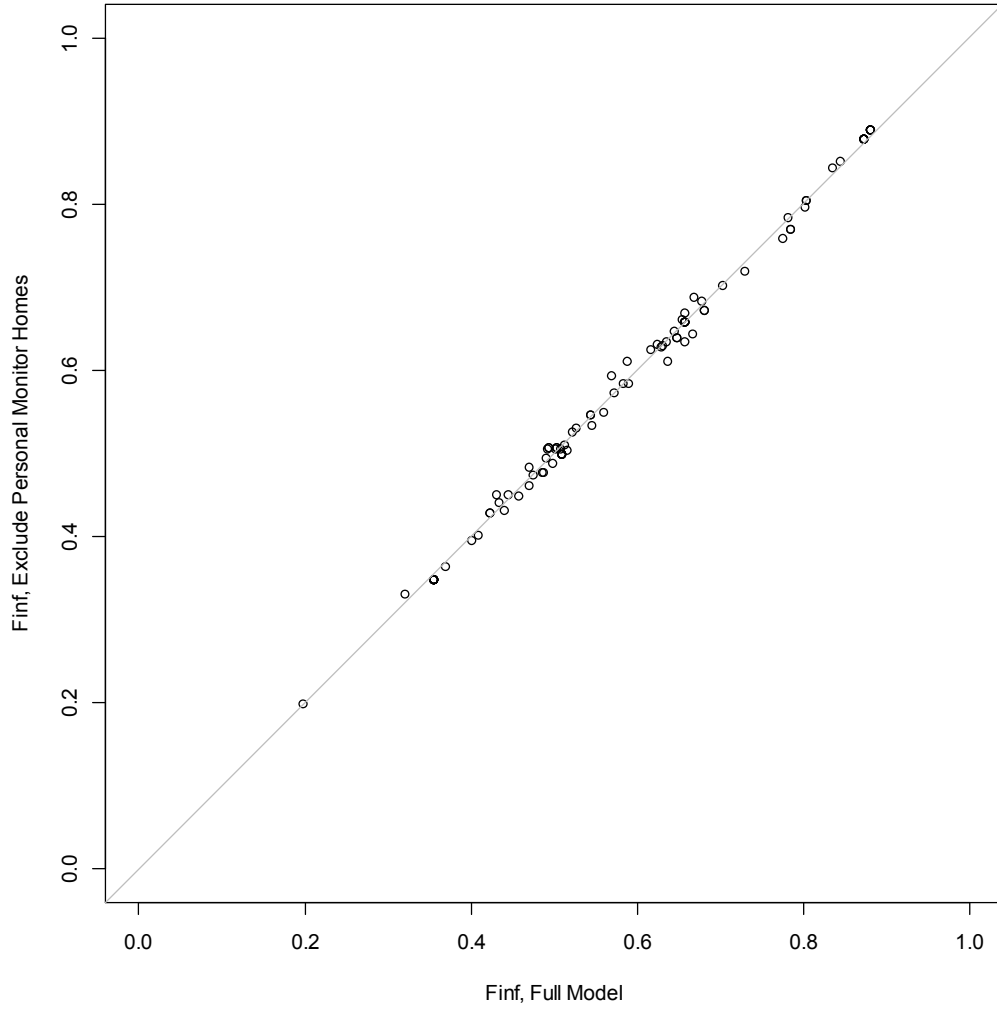

Table S13. Explanatory value of demographic characteristics on the comparison between reference personal exposure metric and predicted personal exposure. Values are p-values from likelihood ratio tests comparing models with and without additional demographic variables. Linear mixed models were used to account for correlation within participants. Each demographic characteristic was evaluated separately with and without site adjustment.

|                                                                                                                      | No site adjustment | With site adjustment |
|----------------------------------------------------------------------------------------------------------------------|--------------------|----------------------|
| Age (linear in years)                                                                                                | 0.16               | 0.41                 |
| Sex (Binary: Male or Female)                                                                                         | 0.77               | 0.61                 |
| Race/Ethnicity (Categories: white, Chinese, Black, Hispanic)                                                         | 0.71               | 0.69                 |
| Building Type (Categories: Single Family, Rowhouse, Apt/Condo $\geq$ 6 stories, Apt/Condo $<$ 6 stories, Du/Triplex) | 0.94               | 0.99                 |
| City (Categories: clinic center)                                                                                     | 0.56               | N/A                  |
| Season (Categories: cold, warm, very warm)                                                                           | 0.13               | 0.18                 |
| Month of Sample (Categories: each calendar month)                                                                    | 0.15               | 0.20                 |
| Time in Transit (linear in percent)                                                                                  | 0.74               | 0.82                 |
